# Supplementary material for: Simulation time analysis of kinetic Monte Carlo algorithmic steps for basic radical (de)polymerization kinetics of linear polymers
Source: Royal Society of Chemistry journal article supplement (doi:10.1039/d2re00451h), 2022-11-28
Supplement: d2re00451h1.pdf [file d2re00451h1.pdf]

## Supporting information for

### Simulation time analysis of kinetic Monte Carlo algorithmic steps for basic radical (de)polymerization kinetics of linear polymers

A. D. Trigilio,<sup>a</sup> Y. W. Marien,<sup>a\*</sup> M. Edeleva,<sup>b</sup> D. R. D'hooge<sup>\*a,c</sup> and P. H. M. Van Steenberge<sup>a</sup>

<sup>a</sup> Laboratory for Chemical Technology (LCT), Ghent University, Technologiepark 125, B-9052 Gent, Belgium.

<sup>b</sup> Centre for Polymer and Material Technologies (CPMT), Ghent University, Technologiepark 130, B-9052 Gent, Belgium.

<sup>c</sup> Centre for Textile Science and Engineering (CTSE), Ghent University, Technologiepark 70a, B-9052 Gent, Belgium.

\* Corresponding authors: [yoshi.marien@ugent.be](mailto:yoshi.marien@ugent.be) and [dagmar.dhooge@ugent.be](mailto:dagmar.dhooge@ugent.be)

#### 1. Kinetic parameters for the studied polymerization processes

In this section, we show the kinetic parameters used in the Arrhenius chemical rate coefficient for the three polymerization processes under study: free radical polymerization (FRP) of methyl methacrylate (Table S1), nitroxide mediated polymerization (NMP) of styrene (Table S2), and radical depolymerization of poly(methyl methacrylate) (Table S3).

**Table S1. Kinetic parameters for the free radical polymerization (FRP) of methyl methacrylate**

| Reaction Channel                               | A ((L mol <sup>-1</sup> ) s <sup>-1</sup> ) | E <sub>a</sub> (kJ mol <sup>-1</sup> ) | Reference |
|------------------------------------------------|---------------------------------------------|----------------------------------------|-----------|
| Conventional radical dissociation              | 5.88·10 <sup>5</sup>                        | 133.0                                  | 1-5       |
| Chain Initiation                               | 2.67·10 <sup>6</sup>                        | 22.4                                   | 6, 7      |
| Propagation                                    | 2.67·10 <sup>6</sup>                        | 22.4                                   | 8-12      |
| Termination by disproportionation <sup>a</sup> | 8·10 <sup>6</sup>                           | 0                                      |           |
| Termination by recombination <sup>a</sup>      | 2·10 <sup>6</sup>                           | 0                                      |           |
| Chain transfer to monomer                      | 3.54·10 <sup>6</sup>                        | 55.1                                   | 13        |

<sup>a</sup> Average constant value

**Table S2. Kinetic parameters for the nitroxide mediated polymerization (NMP) of styrene**

| Reaction Channel                       | A ((L mol <sup>-1</sup> ) s <sup>-1</sup> ) | E <sub>a</sub> (kJ mol <sup>-1</sup> ) | Reference |
|----------------------------------------|---------------------------------------------|----------------------------------------|-----------|
| Activation                             |                                             |                                        |           |
| from nitroxide + initiator radical     | 1.16·10 <sup>13</sup>                       | 105.3                                  | 14        |
| from radical                           | 4.04·10 <sup>17</sup>                       | 148.7                                  | 14        |
| Deactivation                           |                                             |                                        |           |
| from nitroxide + initiator radical     | 2.80·10 <sup>6</sup>                        | 0                                      | 14        |
| from radical                           | 1.09·10 <sup>6</sup>                        | 0                                      | 14        |
| Chain initiation                       |                                             |                                        |           |
| from fragment of Type I                | 1.55·10 <sup>6</sup>                        | 16.5                                   | 15        |
| from fragment of Type II               | 4.24·10 <sup>7</sup>                        | 32.5                                   | 16        |
| Propagation                            | 4.24·10 <sup>7</sup>                        | 32.5                                   | 16        |
| Chain transfer to monomer <sup>a</sup> | 2.3·10 <sup>6</sup>                         | 53                                     | 17        |
| Recombination <sup>a,b</sup>           | 1·10 <sup>8</sup>                           | 0                                      | 18        |

<sup>a</sup> The same value is used for all the possible combinations shown in Figure 6 in the main text

<sup>b</sup> Average constant value

**Table S3. Kinetic parameters for the radical depolymerization of poly(methyl methacrylate)**

| Reaction Channel                 | A ((L mol <sup>-1</sup> ) s <sup>-1</sup> ) | E <sub>a</sub> (kJ mol <sup>-1</sup> ) | Reference |
|----------------------------------|---------------------------------------------|----------------------------------------|-----------|
| Fission                          | 2.0·10 <sup>-2</sup>                        | 0                                      | 7         |
| Radical unzipping via β-scission | 5.0·10 <sup>3</sup>                         | 0                                      | 7         |
| Recombination <sup>a</sup>       | 1·10 <sup>4</sup>                           | 0                                      | 7         |

<sup>a</sup> average constant value

## 2. Reaction event frequency analysis of the studied processes

In this section, we present the results for the reaction event frequency for each of the three polymerization processes under study: free radical polymerization (FRP) of methyl methacrylate (Fig. S.1), nitroxide mediated polymerization (NMP) of styrene (Figure S.2), and radical depolymerization of poly(methyl methacrylate) (Figure S.4). For each of the processes, specific reactions are considerably more frequent than others by orders of magnitude, for which special care should be taken in terms of time optimization strategies.

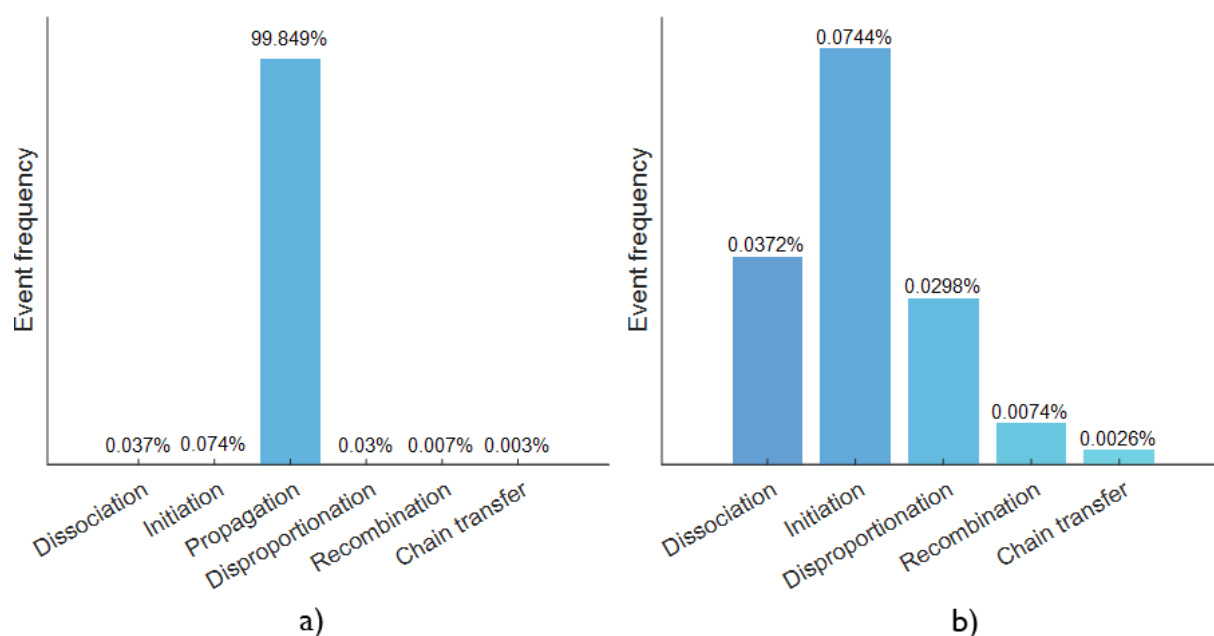

**Figure S1.** Reaction channel frequency for FRP of methyl methacrylate. In (a), the relative frequencies for all the reaction channels are presented, while in (b) the most frequent reaction channel, the one corresponding to propagation, is excluded.

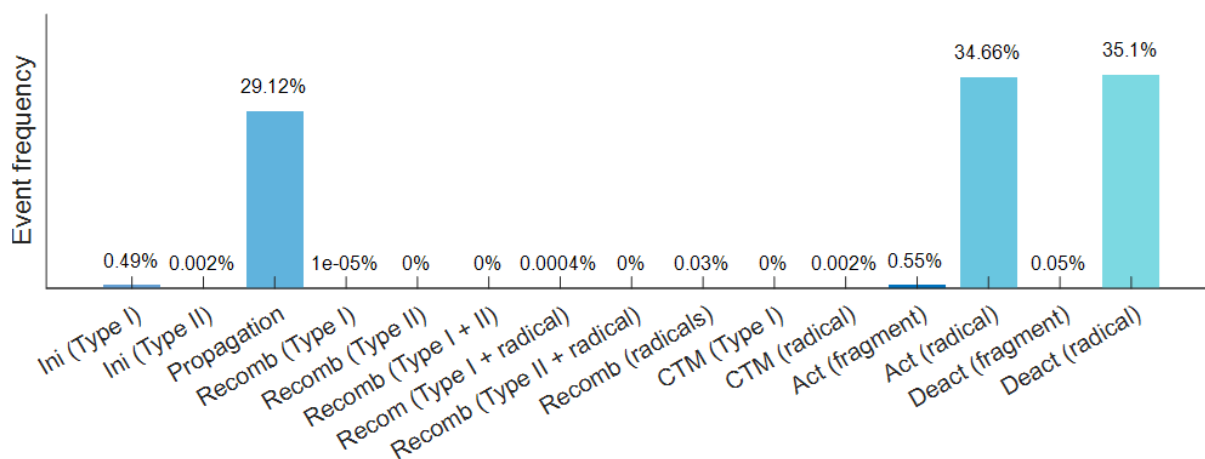

a)

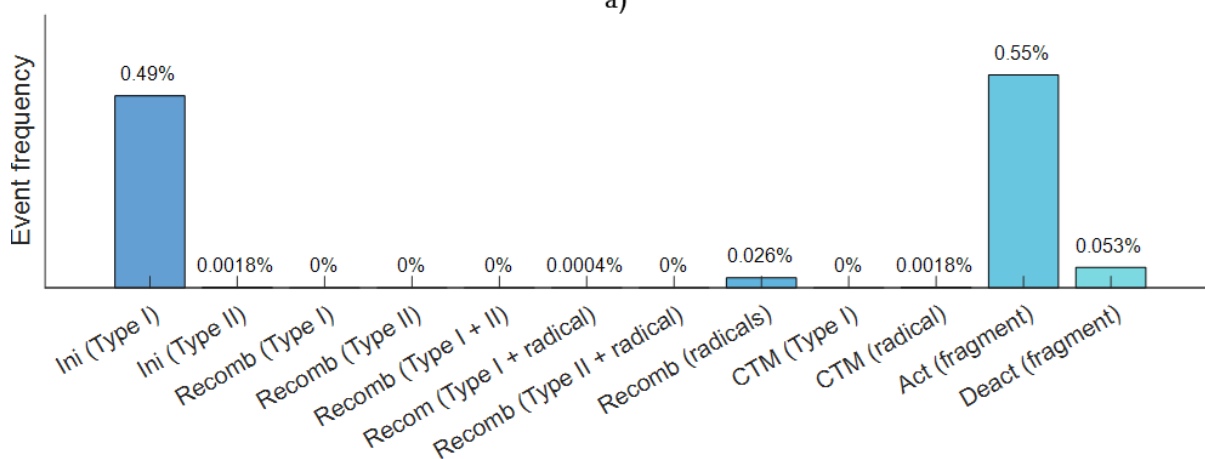

b)

**Figure S2.** Reaction channel frequency for NMP of styrene. In (a), the relative frequencies for all the reaction channels are presented, while in (b) the most frequent reaction channels, the ones corresponding to propagation and the (de)activation via polymer radical, are excluded. The following abbreviations were used: Ini: initiation, Recomb: recombination, CTM: chain transfer to monomer, Act: activation, Deact: deactivation.

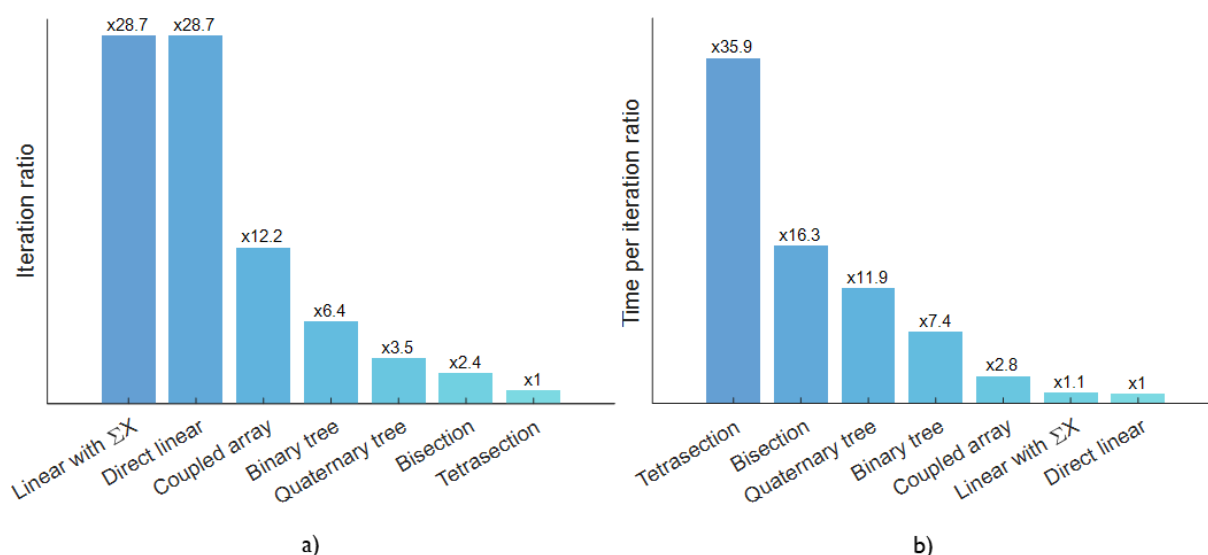

**Figure S3.** Iteration results for NMP showing (a) the number of iterations used per method and (b) the ratio between the simulation time and the number of iterations. Contrary to the  $q$ -search and  $d$ -tree search methods, the linear searches require more iterations but are algorithmically simpler, hence the time per iteration is considerably shorter.

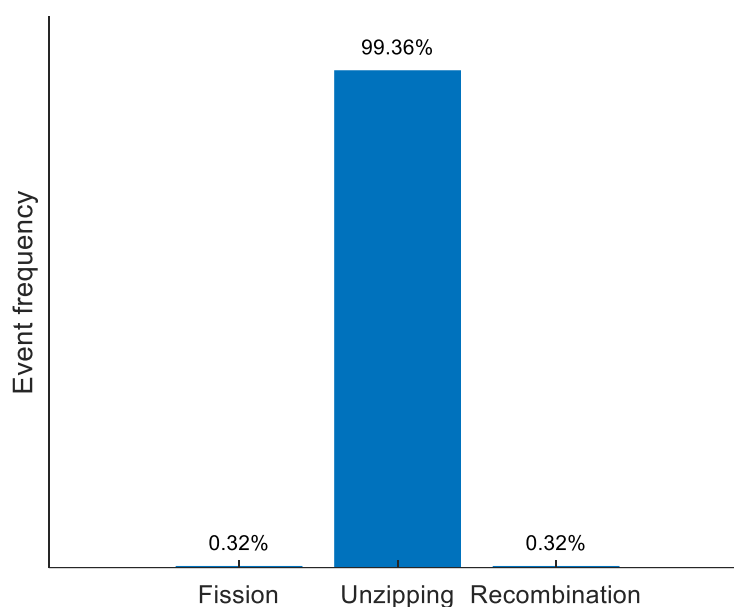

**Figure S4.** Reaction channel frequency for depolymerization of poly(methyl methacrylate). In (a), the relative frequencies for all the reaction channels are presented, while in (b) the most frequent reaction channel, the one corresponding to Unzipping via  $\beta$ -scission, is excluded.

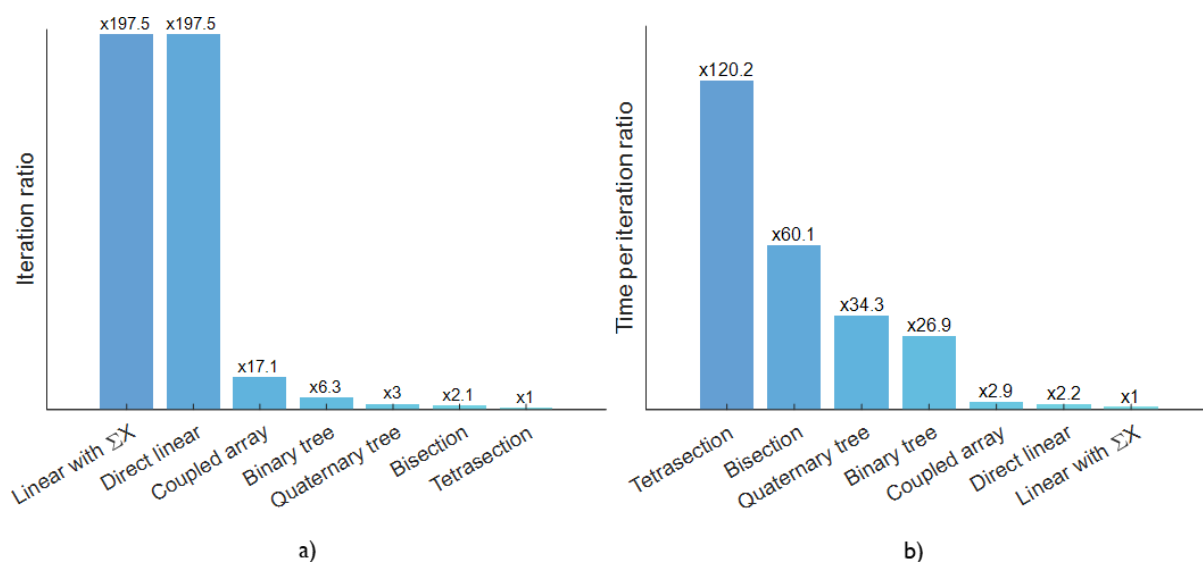

**Figure S5.** Iteration results for depolymerization showing (a) the number of iterations used per method and (b) the ratio between the simulation time and the number of iterations. Contrary to the  $q$ -search and  $d$ -tree search methods, the linear searches require more iterations but are algorithmically simpler, hence the time per iteration is considerably shorter.

### 3. References

- (1) Achillas, D. S.; Kiparissides, C. Development of a general mathematical framework for modeling diffusion-controlled free-radical polymerization reactions. *Macromolecules* **2002**, *25* (14), 3739-3750. DOI: 10.1021/ma00040a021.
- (2) Buback, M.; Huckestein, B.; Kuchta, F. D.; Russell, G. T.; Schmid, E. Initiator Efficiencies in 2,2'-Azobisisobutyronitrile-Initiated Free-Radical Polymerizations of Styrene. *Macromolecular Chemistry and Physics* **1994**, *195* (6), 2117-2140. DOI: DOI 10.1002/macp.1994.021950620.
- (3) Panke, D.; Stickler, M.; Wunderlich, W. Zur polymerisation von methylmethacrylat bis zu hohen umsäten: Experimentelle untersuchungen zur theorie des trommsdorff-effektes nach cardenas und o'driscoll. *Die Makromolekulare Chemie* **1983**, *184* (1), 175-191. DOI: 10.1002/macp.1983.021840118.
- (4) Panke, D. Modelling the free-radical polymerization of methyl methacrylate over the complete range of conversion. *Macromolecular Theory and Simulations* **1995**, *4* (4), 759-772. DOI: 10.1002/mats.1995.040040411.
- (5) Moad, G. A Critical Assessment of the Kinetics and Mechanism of Initiation of Radical Polymerization with Commercially Available Dialkyldiazene Initiators. *Progress in Polymer Science* **2019**, *88*, 130-188. DOI: 10.1016/j.progpolymsci.2018.08.003.
- (6) Gignes, D.; Van Steenberge, P. H. M.; Siri, D.; D'Hooge D, R.; Guillaneuf, Y.; Lefay, C. Simulation of the Degradation of Cyclic Ketene Acetal and Vinyl-Based Copolymers Synthesized via a Radical Process: Influence of the Reactivity Ratios on the Degradability Properties. *Macromol Rapid Commun* **2018**, *39* (19), e1800193. DOI: 10.1002/marc.201800193 From NLM Medline.

- (7) De Smit, K.; Marien, Y. W.; Van Geem, K. M.; Van Steenberge, P. H. M.; D'Hooge, D. R. Connecting polymer synthesis and chemical recycling on a chain-by-chain basis: a unified matrix-based kinetic Monte Carlo strategy. *Reaction Chemistry & Engineering* **2020**, *5* (10), 1909-1928. DOI: 10.1039/d0re00266f.
- (8) Sangster, D. F.; Feldthusen, J.; Strauch, J.; Fellows, C. M. Measurement of Transfer Coefficients to Monomer for n-Butyl Methacrylate by Molecular Weight Distributions from Emulsion Polymerization. *Macromolecular Chemistry and Physics* **2008**, *209* (15), 1612-1627. DOI: 10.1002/macp.200800059.
- (9) Asua, J. M.; Beuermann, S.; Buback, M.; Castignolles, P.; Charleux, B.; Gilbert, R. G.; Hutchinson, R. A.; Leiza, J. R.; Nikitin, A. N.; Vairon, J. P.; et al. Critically evaluated rate coefficients for free-radical polymerization. 5 - Propagation rate coefficient for butyl acrylate. *Macromolecular Chemistry and Physics* **2004**, *205* (16), 2151-2160. DOI: 10.1002/macp.200400355.
- (10) Beuermann, S.; Buback, M. Rate coefficients of free-radical polymerization deduced from pulsed laser experiments. *Progress in Polymer Science* **2002**, *27* (2), 191-254. DOI: 10.1016/S0079-6700(01)00049-1.
- (11) Beuermann, S.; Buback, M.; Davis, T. P.; Gilbert, R. G.; Hutchinson, R. A.; Olaj, O. F.; Russell, G. T.; Schweer, J.; vanHerck, A. M. Critically evaluated rate coefficients for free-radical polymerization. 2. Propagation rate coefficients for methyl methacrylate. *Macromolecular Chemistry and Physics* **1997**, *198* (5), 1545-1560. DOI: DOI 10.1002/macp.1997.021980518.
- (12) Barner-Kowollik, C.; Beuermann, S.; Buback, M.; Castignolles, P.; Charleux, B.; Coote, M. L.; Hutchinson, R. A.; Junkers, T.; Lacik, I.; Russell, G. T.; et al. Critically evaluated rate coefficients in radical polymerization-7. Secondary-radical propagation rate coefficients for methyl acrylate in the bulk. *Polymer Chemistry* **2014**, *5* (1), 204-212. DOI: 10.1039/c3py00774j.
- (13) Stickler, M.; Meyerhoff, G. Die thermische Polymerisation von Methylmethacrylat, 1. Polymerisation in Substanz. *Die Makromolekulare Chemie* **1978**, *179* (11), 2729-2745. DOI: 10.1002/macp.1978.021791115.
- (14) Fierens, S. K.; D'hooge, D. R.; Van Steenberge, P. H. M.; Reyniers, M. F.; Marin, G. B. MAMA-SG1 initiated nitroxide mediated polymerization of styrene: From Arrhenius parameters to model-based design. *Chem Eng J* **2015**, *278*, 407-420. DOI: 10.1016/j.cej.2014.09.024.
- (15) Chauvin, F.; Dufils, P.-E.; Giges, D.; Guillaneuf, Y.; Marque, S. R. A.; Tordo, P.; Bertin, D. Nitroxide-Mediated Polymerization: The Pivotal Role of the  $k_d$  Value of the Initiating Alkoxyamine and the Importance of the Experimental Conditions. *Macromolecules* **2006**, *39* (16), 5238-5250. DOI: 10.1021/ma0527193.
- (16) Buback, M.; Gilbert, R. G.; Hutchinson, R. A.; Klumperman, B.; Kuchta, F. D.; Manders, B. G.; Odriscoll, K. F.; Russell, G. T.; Schweer, J. Critically Evaluated Rate Coefficients for Free-Radical Polymerization. 1. Propagation Rate Coefficient for Styrene. *Macromolecular Chemistry and Physics* **1995**, *196* (10), 3267-3280. DOI: DOI 10.1002/macp.1995.021961016.
- (17) Hui, A. W.; Hamielec, A. E. Thermal Polymerization of Styrene at High Conversions and Temperatures - an Experimental Study. *Journal of Applied Polymer Science* **1972**, *16* (3), 749-&. DOI: DOI 10.1002/app.1972.070160319.
- (18) De Smit, K.; Marien, Y. W.; Edeleva, M.; Van Steenberge, P. H. M.; D'hooge, D. R. Roadmap for Monomer Conversion and Chain Length-Dependent Termination Reactivity Algorithms in Kinetic Monte Carlo Modeling of Bulk Radical Polymerization. *Industrial & Engineering Chemistry Research* **2020**, *59* (52), 22422-22439. DOI: 10.1021/acs.iecr.0c04328.
